# Supplementary material for: Controlled Thermal Release of L-Menthol with Cellulose-Acetate-Fiber-Shelled Metal-Organic Framework
Source: MDPI journal article supplement (doi:10.3390/molecules27186013), 2022-09-15
Supplement: s1 [file s1]

---

# Supplementary for

## Controlled Thermal Release of L-Menthol with

## Cellulose Acetate Fiber Shelled Metal-Organic

## Framework

Xinjiao Cui<sup>1,†</sup>, Donghao Ye<sup>2,†</sup>, Jiankun Wei<sup>1</sup>, Xiaodi Du<sup>1,\*</sup>, Pengzhao Wang<sup>3,\*</sup>  
and Junsheng Li<sup>1,\*</sup>

<sup>1</sup> School of Chemistry, Chemical Engineering and Life Sciences, Wuhan University of Technology,  
Wuhan 430070, P. R. China

<sup>2</sup> Wuhan Marine Electric Propulsion Research Institute, Wuhan 430064, P. R. China

<sup>3</sup> College of Chemical Engineering, Fuzhou University, Fuzhou 350108, P. R. China

\* duxiaodi@msn.com (X. Du), wpz@fzu.edu.cn (P. Wang), li\_j@whut.edu.cn, (J. Li).

Table S1. Shifts in corresponding IR peaks of MIL-101 (Cr) and LM@ MIL-101 (Cr)

| Assignment                                                                     | MIL-101 (Cr)          | LM@MIL-101 (Cr)       |
|--------------------------------------------------------------------------------|-----------------------|-----------------------|
| OH- stretching vibration                                                       | 3450 cm <sup>-1</sup> | 3380 cm <sup>-1</sup> |
| -C-H, -CH <sub>3</sub> , and -CH <sub>2</sub> asymmetric stretching vibrations | /                     | 2960 cm <sup>-1</sup> |
| -C-H, -CH <sub>2</sub> asymmetric stretching                                   | /                     | 2930 cm <sup>-1</sup> |
| -C-H symmetric stretching vibrations                                           | /                     | 2870 cm <sup>-1</sup> |
| C=C stretching vibration                                                       | 1630 cm <sup>-1</sup> | 1630 cm <sup>-1</sup> |
| C=C stretching vibration                                                       | 1500 cm <sup>-1</sup> | 1500 cm <sup>-1</sup> |
| O-C-O symmetric stretching vibration                                           | 1380 cm <sup>-1</sup> | 1400 cm <sup>-1</sup> |
| C-H stretching vibration                                                       | 1050 cm <sup>-1</sup> | 1050 cm <sup>-1</sup> |
| C-H stretching vibration                                                       | 1020 cm <sup>-1</sup> | 1020 cm <sup>-1</sup> |
| C-H stretching vibration                                                       | 750 cm <sup>-1</sup>  | 747 cm <sup>-1</sup>  |
| Cr-O stretching vibration                                                      | 550 cm <sup>-1</sup>  | 592 cm <sup>-1</sup>  |

Table S2. BET date analysis of MIL-101 (Cr) and LM@ MIL-101 (Cr)

| Samples         | BET Area                               | Micropore Area                           | Micropore volume                      |
|-----------------|----------------------------------------|------------------------------------------|---------------------------------------|
| MIL-101 (Cr)    | 2636.8 m <sup>2</sup> .g <sup>-1</sup> | 406.8167 m <sup>2</sup> .g <sup>-1</sup> | 1.06 cm <sup>3</sup> .g <sup>-1</sup> |
| LM@MIL-101 (Cr) | 1344.8 m <sup>2</sup> .g <sup>-1</sup> | 386.8031 m <sup>2</sup> .g <sup>-1</sup> | 0.56 cm <sup>3</sup> .g <sup>-1</sup> |

Table S3. Pseudo-first order and pseudo-second order kinetic fitting parameters

| Modle               | $q_e$                    | $k$                           | $R^2$ |
|---------------------|--------------------------|-------------------------------|-------|
| Pesudo-first order  | 432.1 mg g <sup>-1</sup> | 4.46 min <sup>-1</sup>        | 0.996 |
| Pesudo-second order | 448.8 mg g <sup>-1</sup> | 0.02 g (mg.min) <sup>-1</sup> | 0.980 |

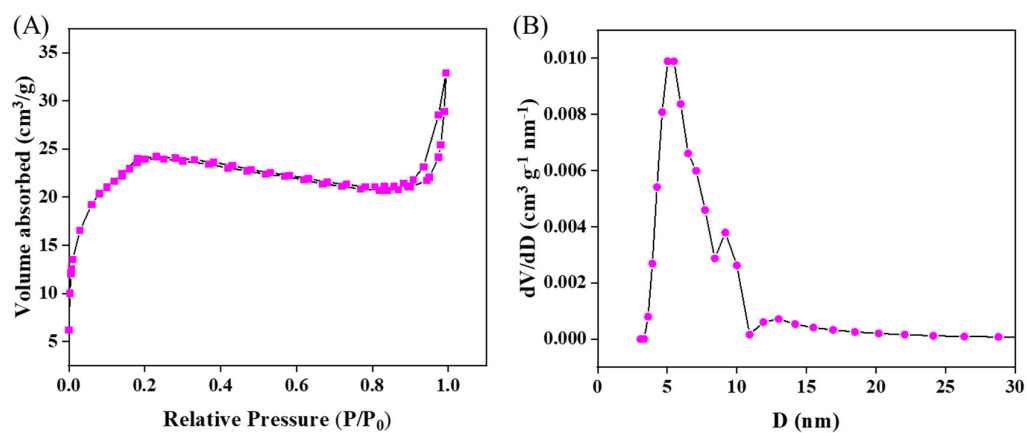Figure S1. (A) N<sub>2</sub> adsorption/desorption isotherms; (B) Pore size distribution of LM@MIL-101 (Cr)-CAF<sub>0.9</sub>.

Table S4. Heat release of LM in different systems

| Samples                            | The amount of LM released (μg) |       |       |       |       |       |       |       |
|------------------------------------|--------------------------------|-------|-------|-------|-------|-------|-------|-------|
|                                    | 32s                            | 64s   | 96s   | 128s  | 160s  | 192s  | 224s  | 256s  |
| LM                                 | 14.41                          | 15.29 | 16.68 | 14.81 | 13.46 | 12.81 | 12.60 | 11.79 |
| LM-CAF <sub>0.9</sub>              | 9.11                           | 11.73 | 8.69  | 8.10  | 6.89  | 6.38  | 5.98  | 5.59  |
| LM@MIL-101 (Cr)-CAF <sub>0.7</sub> | 6.69                           | 8.40  | 8.14  | 7.30  | 6.79  | 6.82  | 5.98  | 5.64  |
| LM@MIL-101 (Cr)-CAF <sub>0.9</sub> | 10.29                          | 11.56 | 10.77 | 10.95 | 10.74 | 9.67  | 9.12  | 8.59  |
| LM@MIL-101 (Cr)-CAF <sub>1.1</sub> | 8.06                           | 7.71  | 7.23  | 7.96  | 7.11  | 7.76  | 7.31  | 7.23  |
| LM@MIL-101 (Cr)-CAF <sub>1.3</sub> | 6.58                           | 8.18  | 7.72  | 8.08  | 7.71  | 7.62  | 7.20  | 7.22  |
